# Supplementary material for: Canopy spectral reflectance indices correlate with yield traits variability in bread wheat genotypes under drought stress
Source: PeerJ journal article supplement (doi:10.7717/peerj.14421), 2022-11-25
Supplement: Supplementary_materials_Revised_(1).pdf [file Supplementary_materials_Revised_%281%29.pdf]

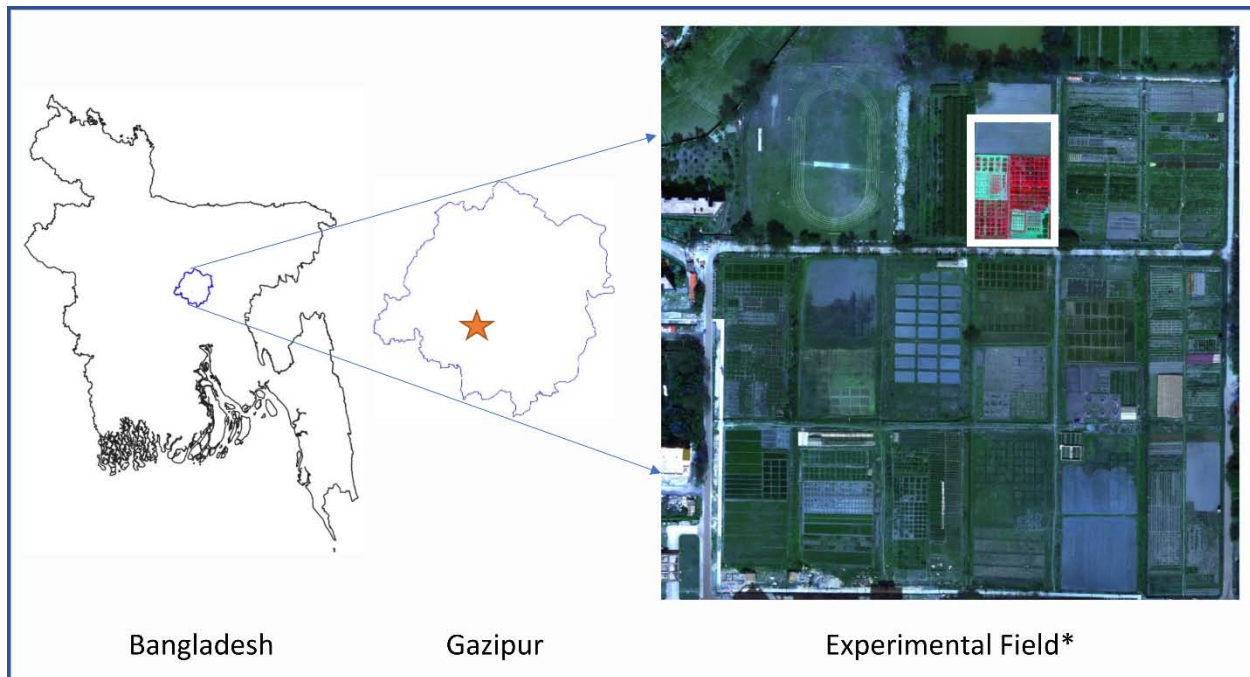

**Figure S1:** Location map showing the field laboratory of the Department of Crop Botany (white rectangle), Bangabandhu Sheikh Mujibur Rahman Agricultural University (24.038 °N latitude, 90.397 °E longitudes), Gazipur, Bangladesh. \* the aerial photograph is taken by the author using an unmanned aerial vehicle (UAV) in March 2022 and does not represent the experimental layout of the present study.

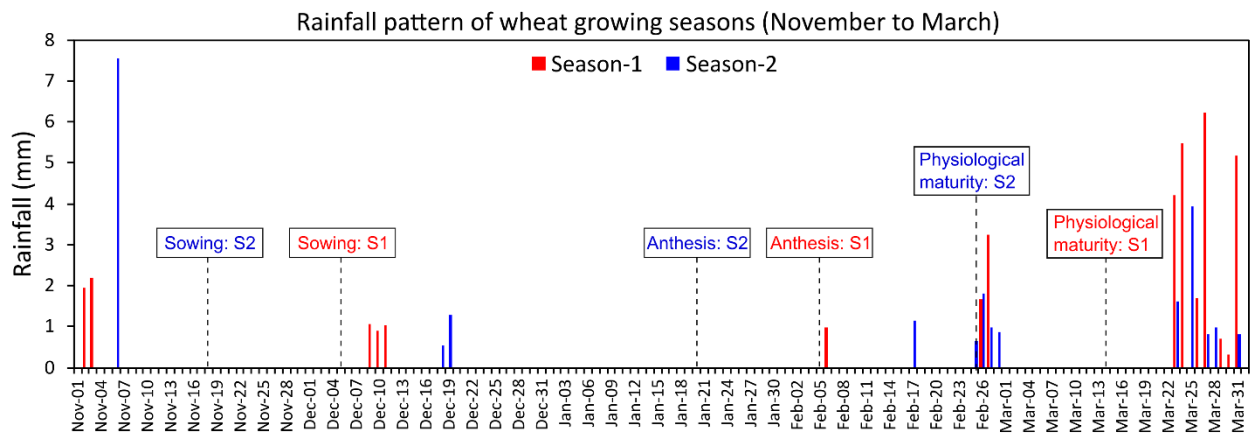

**Figure S2:** Daily rainfall patterns of the experimental site in two wheat growing seasons (1 November to 31 March). S1 and S2 represent wheat growing season 1 and 2, respectively.

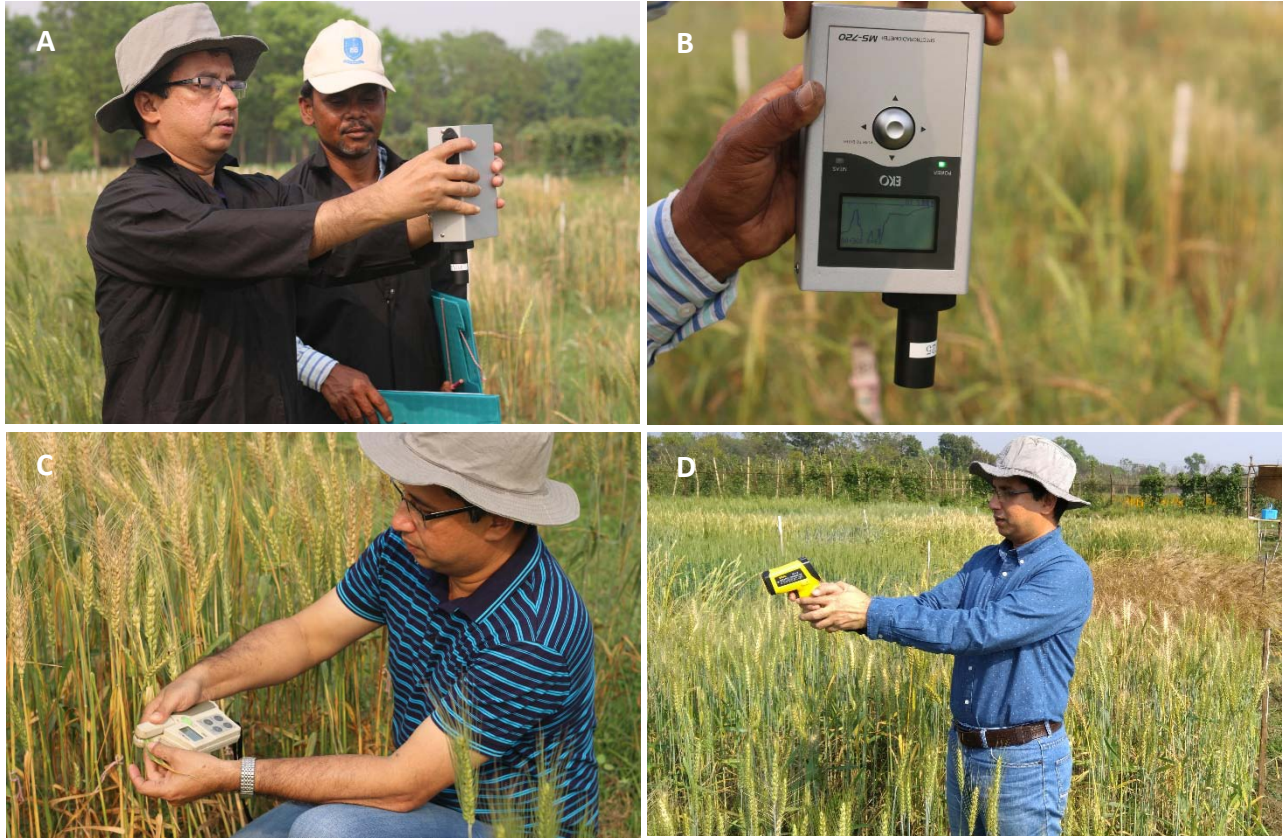

**Figure S3:**Field measurement of canopy reflectance using a spectroradiometer (A, B); SPAD chlorophyll index (C); and canopy temperature (D).

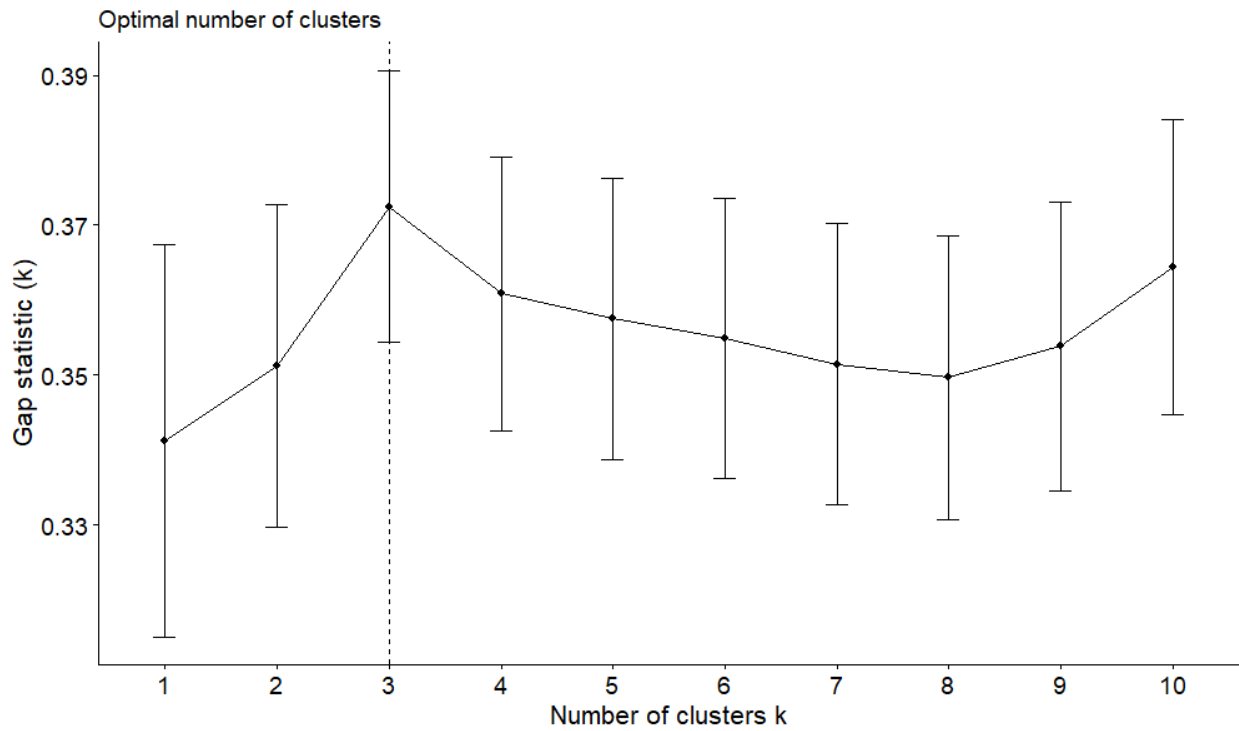

**Figure S4:** Gap statistic showing an optimal number of clusters to be created in the hierarchical cluster analysis based on the relative best linear unbiased estimators (BLUE) values of the SRIs and yield traits.

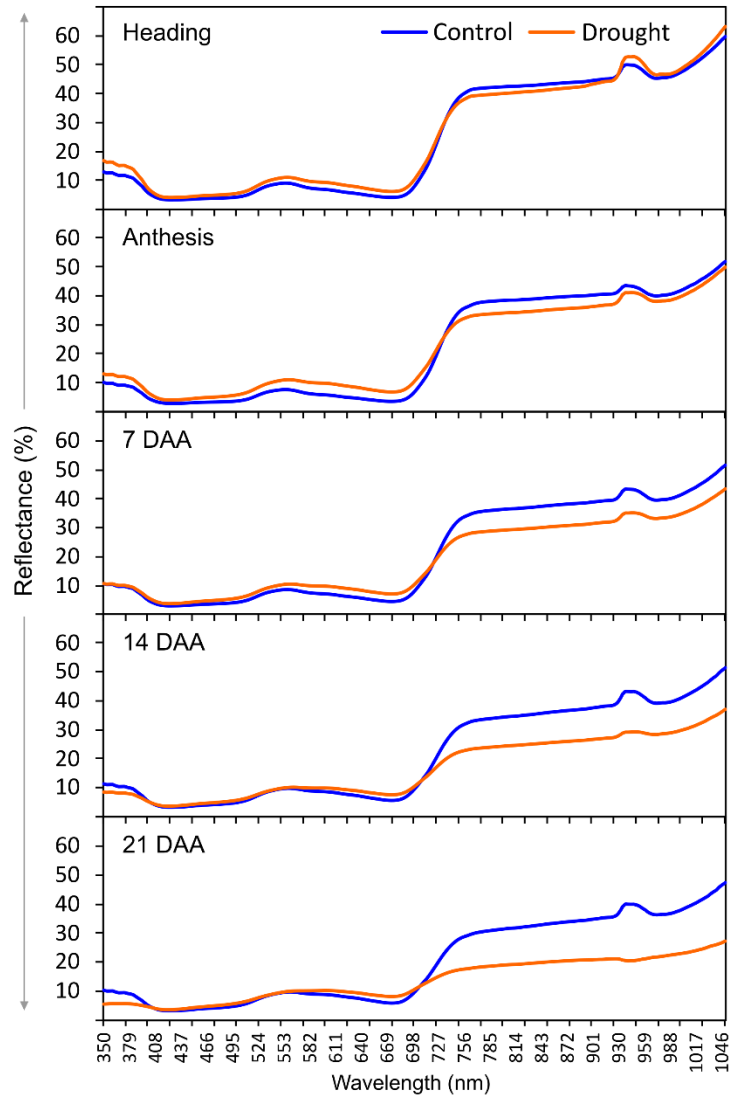

**Figure S5.** Dynamic changes in the reflectance spectra for wheat genotypes subjected to control and drought stress at the reproductive growth stages viz. heading, anthesis, 7 days after anthesis (DAA), 14DAA, and 21DAA. The data are averaged over two growing years. DAA denotes days after anthesis.

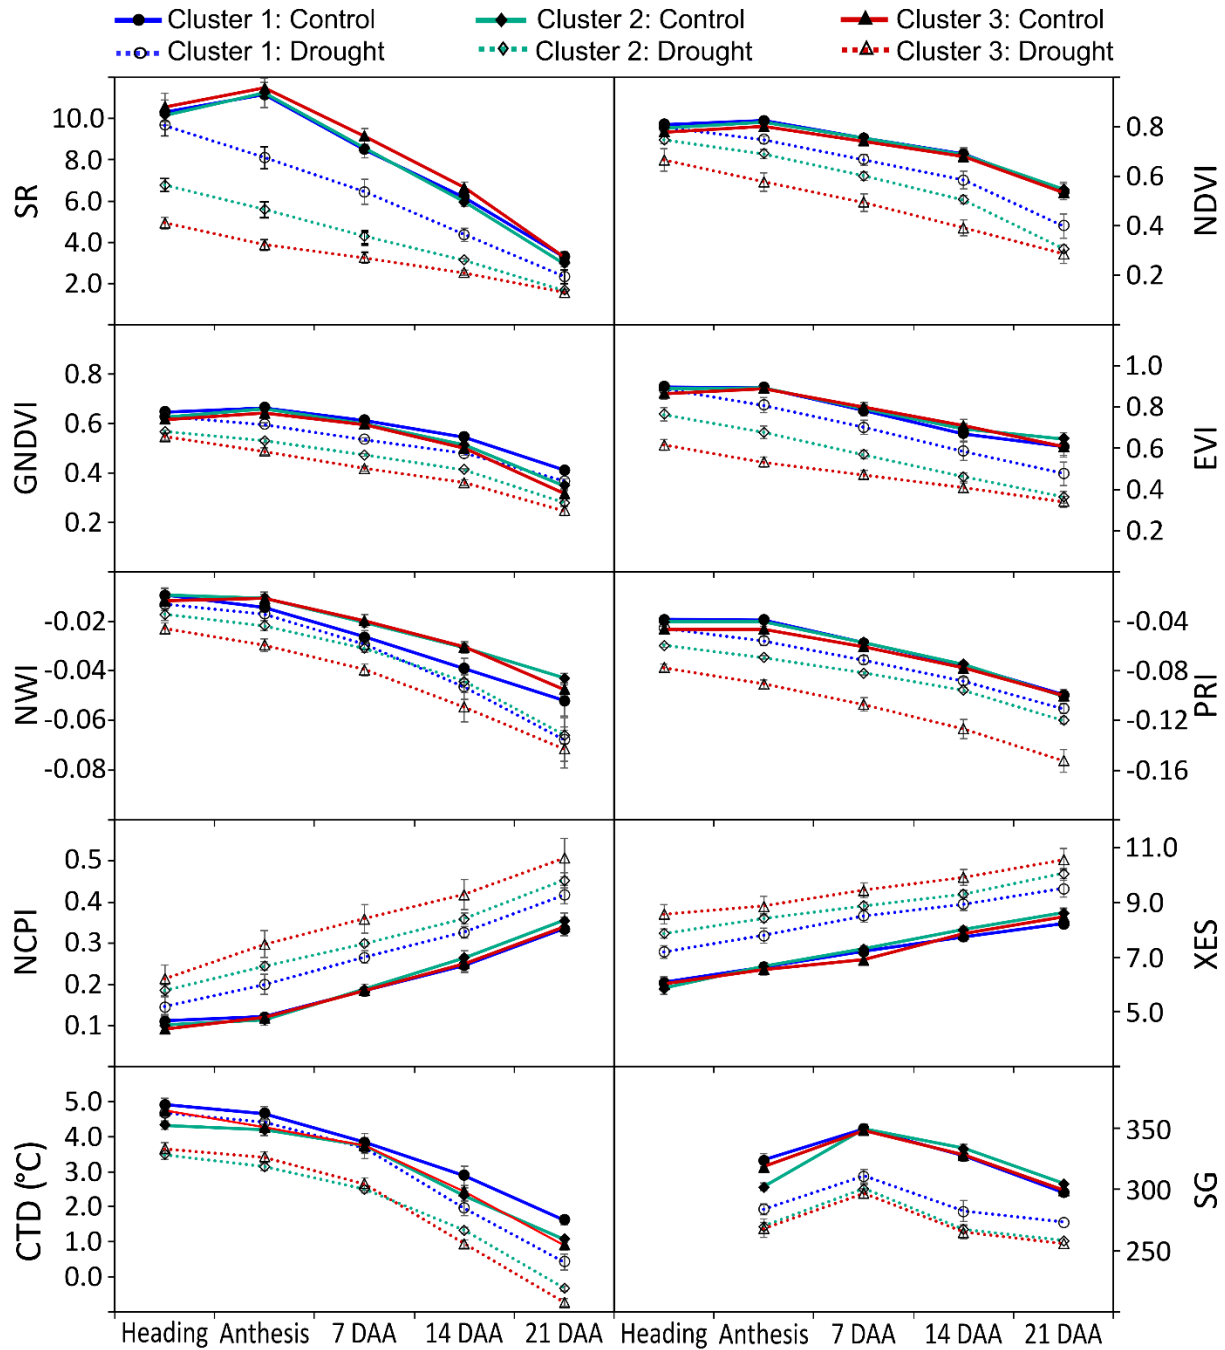

**Figure S6.** The growth stage-specific changes in the SRI of different clusters of 56 wheat genotypes measured under control and drought stress. SRI were estimated as the best linear unbiased estimators across two growing seasons. Additional details are shown in Table 1 and Figure 2.

**Table S1:**List of wheat genotypes used in the exploratory study

| Sl. No. | Genotype    | Source     | Type          | Pedigree/Collected from                                                              |
|---------|-------------|------------|---------------|--------------------------------------------------------------------------------------|
| 1       | AS-10617    | ACI Seed   | Mutant        | BARIGom 25; mutagen: 1% EMS                                                          |
| 2       | AS-10632    | ACI Seed   | Mutant        | BARIGom 25; mutagen: 1% EMS                                                          |
| 3       | BARI Gom 19 | BWMRI      | Variety       | NAC/VEE (NL 560)                                                                     |
| 4       | BARI Gom 20 | BWMRI      | Variety       | TURACO/CHIL                                                                          |
| 5       | BARI Gom 21 | BWMRI      | Variety       | MRNG/BVC//BLO/PVN/3/PJB-81                                                           |
| 6       | BARI Gom 22 | BWMRI      | Variety       | KAN/6/COQ/F61.70//CNDR/3/OLN/4/<br>PHO/5/MRNG/ALDAN//CNO                             |
| 7       | BARI Gom 23 | BWMRI      | Variety       | NL297*2/LR25                                                                         |
| 8       | BARI Gom 24 | BWMRI      | Variety       | G. 162/BL 1316//NL 297                                                               |
| 9       | BARI Gom 25 | BWMRI      | Variety       | ZSH 12/HLB 19//2*NL297                                                               |
| 10      | BARI Gom 26 | BWMRI      | Variety       | ICTAL 123/3/RAWAL<br>87//VEE/HD2285                                                  |
| 11      | BARI Gom 27 | BWMRI      | Variety       | WAXWING*2/VIVISTI                                                                    |
| 12      | BARI Gom 28 | BWMRI      | Variety       | CHIL/2*STAR/4/BOW/CROW//BUC/P<br>VN/3/2*VEE#10                                       |
| 13      | BARI Gom 29 | BWMRI      | Variety       | SOURAV/7/KLAT/SOREN//PSN/3/BO<br>W/4/VEE#5. 10/5/CNO 67/MFD//<br>MON/3/ SERI/6/NL297 |
| 14      | BARI Gom 30 | BWMRI      | Variety       | BAW 677/Bijoy                                                                        |
| 15      | BARI Gom 31 | BWMRI      | Variety       | KAL/BB/YD/3/PASTOR                                                                   |
| 16      | BARI Gom 32 | BWMRI      | Variety       | SHATABDI/GOURAB                                                                      |
| 17      | BARI Gom 33 | BWMRI      | Variety       | KACHU/SOLALA                                                                         |
| 18      | BAW-1147    | BWMRI      | Advanced line | WRS, Gazipur                                                                         |
| 19      | BD-4638     | PGRC, BARI | Accession     | -                                                                                    |
| 20      | BD-466      | PGRC, BARI | Accession     | -                                                                                    |
| 21      | BD-467      | PGRC, BARI | Accession     | -                                                                                    |
| 22      | BD-476      | PGRC, BARI | Accession     | -                                                                                    |
| 23      | BD-477      | PGRC, BARI | Accession     | -                                                                                    |
| 24      | BD-494      | PGRC, BARI | Accession     | -                                                                                    |
| 25      | BD-495      | PGRC, BARI | Accession     | -                                                                                    |
| 26      | BD-523      | PGRC, BARI | Accession     | -                                                                                    |
| 27      | BD-525      | PGRC, BARI | Accession     | -                                                                                    |
| 28      | BD-526      | PGRC, BARI | Accession     | -                                                                                    |
| 29      | BD-553      | PGRC, BARI | Accession     | -                                                                                    |

| Sl. No. | Genotype     | Source     | Type      | Pedigree/Collected from |
|---------|--------------|------------|-----------|-------------------------|
| 30      | BD-567       | PGRC, BARI | Accession | -                       |
| 31      | BD-574       | PGRC, BARI | Accession | -                       |
| 32      | BD-576       | PGRC, BARI | Accession | -                       |
| 33      | BD-580       | PGRC, BARI | Accession | -                       |
| 34      | BD-587       | PGRC, BARI | Accession | -                       |
| 35      | BD-588       | PGRC, BARI | Accession | -                       |
| 36      | BD-600       | PGRC, BARI | Accession | -                       |
| 37      | BD-604       | PGRC, BARI | Accession | -                       |
| 38      | BD-616       | PGRC, BARI | Accession | -                       |
| 39      | BD-622       | PGRC, BARI | Accession | -                       |
| 40      | BD-623       | PGRC, BARI | Accession | -                       |
| 41      | BD-631       | PGRC, BARI | Accession | -                       |
| 42      | BD-637       | PGRC, BARI | Accession | -                       |
| 43      | BD-666       | PGRC, BARI | Accession | -                       |
| 44      | BD-684       | PGRC, BARI | Accession | -                       |
| 45      | BD-9889      | PGRC, BARI | Accession | RARS, Ishurdi           |
| 46      | BD-9891      | PGRC, BARI | Accession | RARS, Ishurdi           |
| 47      | BD-9896      | PGRC, BARI | Accession | RARS, Ishurdi           |
| 48      | BD-9897      | PGRC, BARI | Accession | RARS, Ishurdi           |
| 49      | BD-9905      | PGRC, BARI | Accession | RARS, Ishurdi           |
| 50      | BD-9906      | PGRC, BARI | Accession | RARS, Ishurdi           |
| 51      | BD-9910      | PGRC, BARI | Accession | RARS, Ishurdi           |
| 52      | BD-9911      | PGRC, BARI | Accession | RARS, Ishurdi           |
| 53      | BD-9913      | PGRC, BARI | Accession | RARS, Ishurdi           |
| 54      | BD-9930      | PGRC, BARI | Accession | RARS, Ishurdi           |
| 55      | BINA wheat 1 | BINA       | Variety   | L-880-43                |
| 56      | Kanchan      | BWMRI      | Variety   | UP301/C306              |

ACI- Advanced Chemical Industries; BARI- Bangladesh Agricultural Research Institute; BINA- Bangladesh Institute of Nuclear Agriculture; BWMRI- Bangladesh Wheat and Maize Research Institute; PGRC- Plant Genetic Resource Center; RARS- Regional Agricultural Research Station; WRS- Wheat Research Station.



**Table S2:** Monthly average climatic data across two wheat-growing seasons and the averages of ten successive years (2010 – 2019) in the experimental site (24.038°N, 90.397°E).

| Month                                     | Air Temperature (°C) |      |      | Soil Temp. (°C)<br>(30 cm depth) | Humidity (%) | Total Rainfall (mm) | Daily mean evaporation (mm) |
|-------------------------------------------|----------------------|------|------|----------------------------------|--------------|---------------------|-----------------------------|
|                                           | Max                  | Min  | Mean |                                  |              |                     |                             |
| <i>Average across two growing seasons</i> |                      |      |      |                                  |              |                     |                             |
| November                                  | 29.4                 | 17.7 | 23.6 | 23.9                             | 88.3         | 11.7                | 2.4                         |
| December                                  | 25.8                 | 14.2 | 20.0 | 19.8                             | 88.3         | 4.9                 | 1.6                         |
| January                                   | 24.9                 | 11.1 | 18.0 | 16.9                             | 86.7         | 0.0                 | 1.7                         |
| February                                  | 28.2                 | 15.1 | 21.7 | 19.2                             | 84.9         | 7.5                 | 2.7                         |
| March                                     | 31.9                 | 19.3 | 25.6 | 23.2                             | 84.0         | 19.6                | 3.9                         |
| <i>The ten-year average</i>               |                      |      |      |                                  |              |                     |                             |
| November                                  | 29.0                 | 18.9 | 23.9 | 24.9                             | 84.3         | 15.9                | 2.2                         |
| December                                  | 25.0                 | 13.8 | 19.4 | 20.9                             | 86.6         | 8.3                 | 1.5                         |
| January                                   | 22.9                 | 11.4 | 17.2 | 18.2                             | 87.2         | 3.2                 | 1.6                         |
| February                                  | 27.7                 | 15.6 | 21.6 | 20.5                             | 83.0         | 11.0                | 2.8                         |
| March                                     | 31.7                 | 20.9 | 26.3 | 23.7                             | 80.2         | 50.2                | 3.8                         |

Source: BSMRAU Weather Station, Department of Agricultural Engineering, BSMRAU.

**Table S3:** Extracted Eigenvalues and latent vectors of the PCA conducted using the relative values of best linear unbiased estimators (BLUE) of spectral reflectance indices and yield traits associated with the first five principal components

| Variable                  | Principal components  |        |        |        |        |
|---------------------------|-----------------------|--------|--------|--------|--------|
|                           | PC1                   | PC2    | PC3    | PC4    | PC5    |
| Extracted Eigenvalues     | 12.05                 | 1.95   | 1.63   | 1.34   | 1.17   |
| Explained variance (%)    | 48.2                  | 7.8    | 6.5    | 5.4    | 4.7    |
| Cumulative variance (%)   | 48.2                  | 56.0   | 62.5   | 67.9   | 72.6   |
| <i>Traits and indices</i> | <i>Latent vectors</i> |        |        |        |        |
| SR                        | 0.882                 | -0.073 | 0.063  | -0.138 | 0.058  |
| NDVI                      | 0.868                 | -0.223 | 0.193  | -0.086 | -0.102 |
| GNDVI                     | 0.736                 | -0.164 | 0.075  | -0.093 | 0.056  |
| NWI                       | 0.722                 | 0.169  | -0.226 | 0.072  | -0.160 |
| PRI                       | 0.816                 | -0.224 | -0.086 | 0.034  | 0.256  |
| NCPI                      | -0.593                | 0.266  | 0.081  | -0.064 | -0.169 |
| ARI                       | 0.119                 | 0.449  | 0.379  | 0.316  | -0.562 |
| mCRI                      | -0.638                | 0.201  | 0.342  | 0.170  | 0.386  |
| XES                       | -0.704                | 0.250  | 0.202  | -0.191 | 0.048  |
| SIPI                      | -0.846                | 0.287  | -0.151 | 0.015  | -0.026 |
| PSRI                      | -0.589                | -0.168 | -0.014 | -0.077 | 0.383  |
| PNSI                      | 0.891                 | -0.031 | 0.225  | -0.075 | -0.006 |
| EVI                       | 0.918                 | -0.019 | 0.169  | -0.049 | 0.088  |
| MSAVI                     | 0.876                 | -0.285 | 0.133  | -0.118 | 0.010  |
| OSAVI                     | 0.921                 | -0.226 | 0.097  | -0.125 | 0.047  |
| SG                        | 0.464                 | -0.125 | -0.273 | 0.197  | -0.278 |
| CTD                       | 0.741                 | 0.260  | -0.293 | 0.073  | -0.163 |
| DTH                       | 0.040                 | -0.107 | -0.841 | -0.063 | -0.114 |
| PH                        | 0.531                 | -0.073 | 0.394  | 0.173  | -0.206 |
| NSM                       | 0.566                 | 0.602  | -0.093 | -0.402 | 0.132  |
| NKS                       | 0.543                 | 0.169  | -0.165 | 0.597  | 0.295  |
| WKS                       | 0.560                 | 0.326  | 0.007  | 0.439  | 0.344  |
| HKW                       | 0.466                 | 0.136  | -0.102 | 0.385  | 0.077  |
| BY                        | 0.651                 | 0.598  | -0.127 | -0.311 | 0.106  |
| GY                        | 0.767                 | 0.440  | 0.072  | -0.224 | 0.077  |
